# Supplementary material for: Profoundly improved photostability of dimetronidazole by cocrystallization
Source: Royal Society of Chemistry journal article supplement (doi:10.1039/d2ce00597b), 2022-01-01
Supplement: d2ce00597b1.pdf [file d2ce00597b1.pdf]

## Supporting Information

### Profoundly improved photostability of dimetronidazole by cocrystallization

Xinghui Hao<sup>#a,b</sup>, Jinhui Li<sup>#a,c</sup>, Chenguang Wang<sup>d</sup>, Xinghua Zhao<sup>a,b</sup>, Xin He<sup>a,b\*</sup> and  
Changquan Calvin Sun<sup>\*d</sup>

<sup>a</sup> College of Veterinary Medicine, Hebei Agricultural University, Baoding, Hebei 071000  
China

<sup>b</sup> Veterinary Biological Technology Innovation Center of Hebei Province, Baoding, Hebei,  
071000, China.

<sup>c</sup> Hebei Shengxue Dacheng Pharmaceutical(Tangshan)Co., Ltd. 064000, China.

<sup>d</sup> Pharmaceutical Materials Science and Engineering Laboratory, Department of  
Pharmaceutics, College of Pharmacy, University of Minnesota, Minneapolis, MN 55455, USA

**Table S1.** Intermolecular interaction energies estimated using CE-B3LYP dispersion-corrected DFT models. Both the total energy ( $E_{\text{tot}}$ ) and electrostatic ( $E_{\text{ele}}$ ), polarization ( $E_{\text{pol}}$ ), dispersion ( $E_{\text{dis}}$ ), and exchange-repulsion ( $E_{\text{rep}}$ ) components are listed (kJ/mol). R indicated the distance between centers of mass of the pair of molecules (Å).

#### DMZ-SAC

| N | Symop      | R    | $E_{\text{ele}}$ | $E_{\text{pol}}$ | $E_{\text{dis}}$ | $E_{\text{rep}}$ | $E_{\text{tot}}$ |
|---|------------|------|------------------|------------------|------------------|------------------|------------------|
| 1 | -          | 7.23 | -11.6            | -2.9             | -8.3             | 9.5              | -15.9            |
| 1 | -          | 6.92 | 4                | -2.6             | -11.4            | 9                | -2.1             |
| 1 | -x, -y, -z | 8.87 | -0.8             | -0.5             | -4.5             | 1.2              | -4.4             |
| 1 | -          | 3.78 | -5               | -2.9             | -43.5            | 27.4             | -28.4            |
| 1 | -          | 8.58 | -11.5            | -2.5             | -8               | 9.1              | -15.3            |
| 1 | -          | 7.28 | -14.1            | -3.2             | -8.3             | 13.8             | -16              |
| 1 | -          | 8.8  | -6.9             | -2.1             | -6.9             | 9.2              | -9.2             |
| 2 | x, y, z    | 7.99 | -2.8             | -0.8             | -3.7             | 0.5              | -6.5             |

|   |                       |      |       |       |       |      |       |
|---|-----------------------|------|-------|-------|-------|------|-------|
| 2 | -x+1/2, y+1/2, -z+1/2 | 7.12 | -2.6  | -1.7  | -6.3  | 3.8  | -7.2  |
| 1 | -x, -y, -z            | 9.09 | -1    | -0.5  | -3.7  | 0.7  | -4.2  |
| 1 | -                     | 6.61 | -74.6 | -18.3 | -15.4 | 90.1 | -50.2 |
| 1 | -                     | 3.87 | -6.8  | -3    | -44.6 | 29.3 | -30.2 |
| 1 | -x, -y, -z            | 6.73 | 4.8   | -0.6  | -7.1  | 0.8  | -1.1  |
| 2 | x, y, z               | 7.99 | -7.4  | -1.8  | -7.5  | 4.6  | -12.8 |
| 2 | -x+1/2, y+1/2, -z+1/2 | 8.17 | -0.1  | -1.4  | -7.4  | 2.3  | -6.1  |
| 1 | -x, -y, -z            | 6.53 | 7.8   | -0.4  | -6.8  | 0.6  | 2.4   |
| 1 | -x, -y, -z            | 6.73 | 4.8   | -0.6  | -7.1  | 0.8  | -1.1  |

#### DMZ anhydrate

| N | Symop                 | R    | E <sub>ele</sub> | E <sub>pol</sub> | E <sub>dis</sub> | E <sub>rep</sub> | E <sub>tot</sub> |
|---|-----------------------|------|------------------|------------------|------------------|------------------|------------------|
| 2 | -x, -y, -z            | 3.76 | -10.7            | -2               | -37.4            | 20.9             | -32.4            |
| 4 | x+1/2, y+1/2, -z+1/2  | 6.74 | -1.9             | -1.7             | -9               | 5.1              | -8               |
| 2 | -x+1/2, -y+1/2, z+1/2 | 7.39 | -15.4            | -4.8             | -13.2            | 15.2             | -21.9            |
| 2 | x, y, z               | 9.15 | -6.2             | -1.3             | -3.6             | 2.6              | -9.1             |
| 2 | -x+1/2, -y+1/2, z+1/2 | 6.90 | -12.4            | -2.4             | -7.4             | 8.9              | -15.8            |

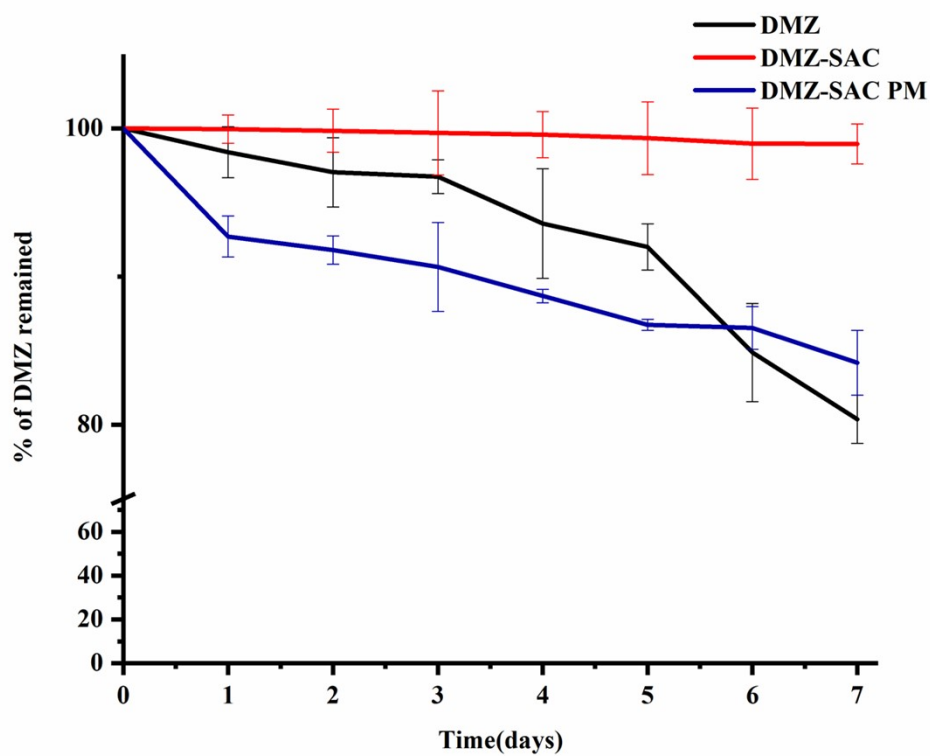

**Fig. S1.** Comparison of DMZ assay values for pure DMZ powder, physical mixture of DMZ and SAC

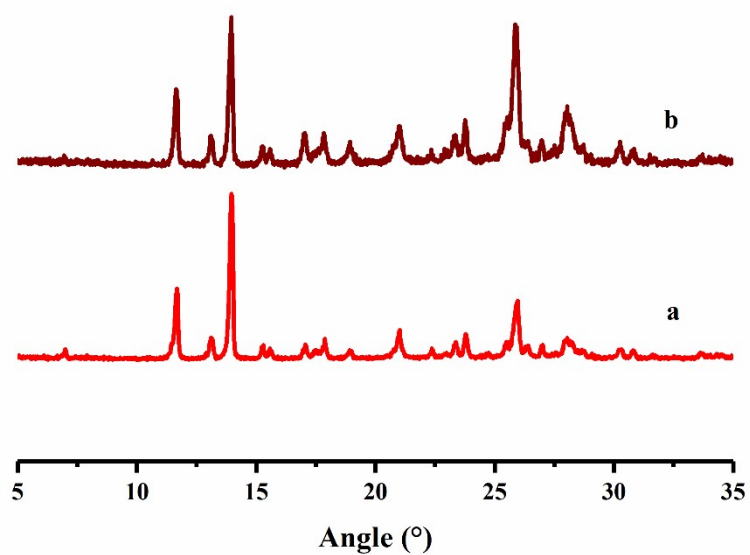

**Fig. S2.** PXRD patterns of DMZ-SAC (a) before and (b) after powder dissolution experiment
